# Supplementary material for: How Have Intravitreal Anti‐VEGF and Dexamethasone Implant Been Used in Italy? A Multiregional, Population‐Based Study in the Years 2010–2016
Source: Hindawi journal article supplement (doi:10.1155/2020/7582763), 2020-01-01
Supplement: f1 [file 7582763.f1.pdf]

**Supplemental Material 1.**

| <b>Active substance</b> | <b>Brand name</b> | <b>MA date</b> | <b>Indication</b>     | <b>Summary of product characteristics recommendations</b>                                                                                               |
|-------------------------|-------------------|----------------|-----------------------|---------------------------------------------------------------------------------------------------------------------------------------------------------|
| <b>Aflibercept</b>      | Eylea®            | 2013           | nAMD                  | Three monthly injections, followed by 1 injection every 2 months. After the first 12 months of treatment, the treat-and-extend approach may be adopted. |
|                         |                   |                | Branch or central RVO | Monthly injections. After the first 3 injections, the treat-and-extend approach may be adopted.                                                         |
|                         |                   |                | DME                   | Five monthly injections, followed by 1 injection every 2 months. After the first 12 months of treatment, the treat-and-extend approach may be adopted.  |
|                         |                   |                | CNV                   | Injections as needed (1 injection may be sufficient)                                                                                                    |
| <b>Ranibizumab</b>      | Lucentis®         | 2007           | nAMD                  | Three or more monthly injections, followed by the treat-and-extend approach.                                                                            |
|                         |                   |                | Branch or central RVO |                                                                                                                                                         |
|                         |                   |                | DME                   |                                                                                                                                                         |
|                         |                   |                | CNV                   | Injections as needed (1 injection may be sufficient).                                                                                                   |
| <b>Pegaptanib</b>       | Macugen®          | 2007           | nAMD                  | One injection every 6 weeks.                                                                                                                            |
| <b>Dexamethasone</b>    | Ozurdex®          | 2011           | Branch or central RVO | One injection every 6 months.                                                                                                                           |
|                         |                   |                | DME                   | Administration to both eyes concurrently is not recommended.                                                                                            |
|                         |                   |                | uveitis               |                                                                                                                                                         |
| <b>Bevacizumab</b>      | Avastin®          | 2005           | nAMD                  | Off-label use.                                                                                                                                          |

Supplementary Material 2.

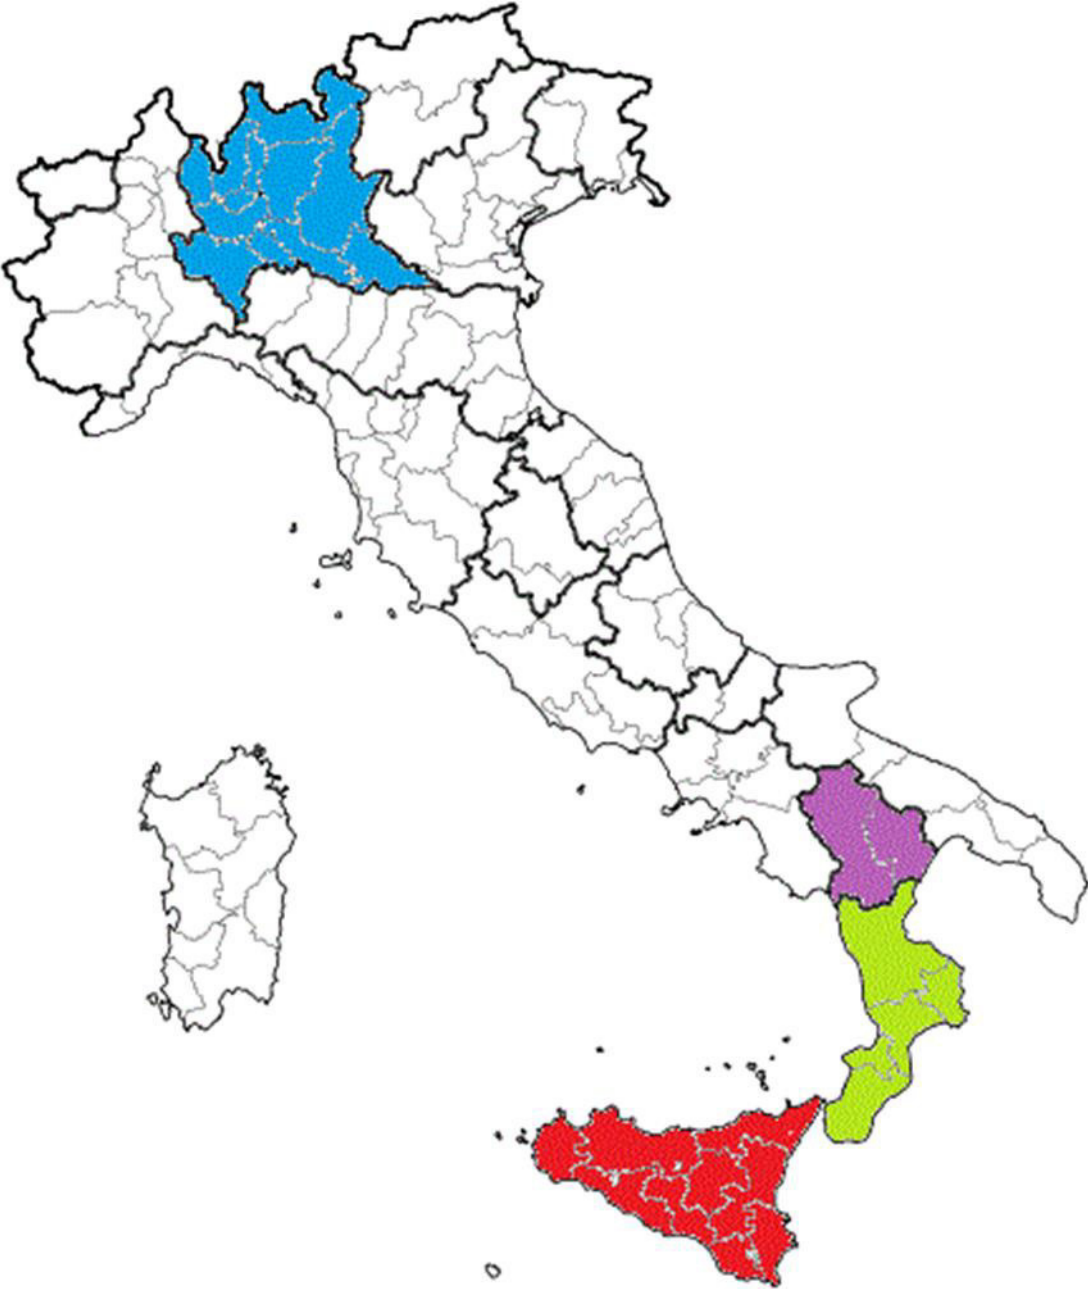

Supplemental Material 3.

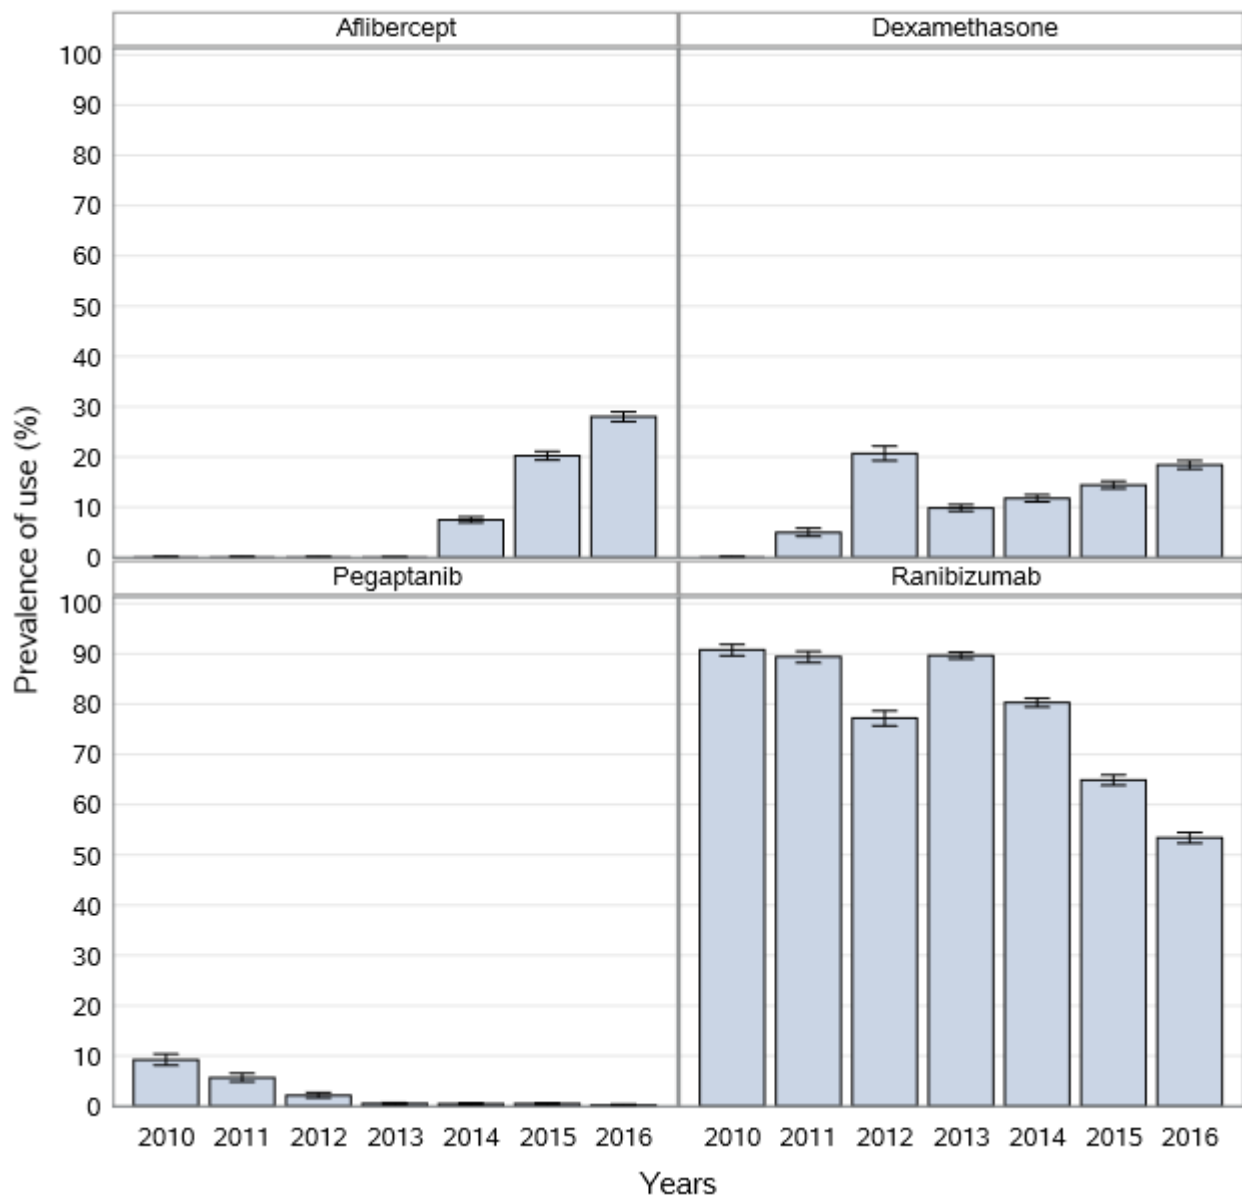

#### Supplemental Material 4.

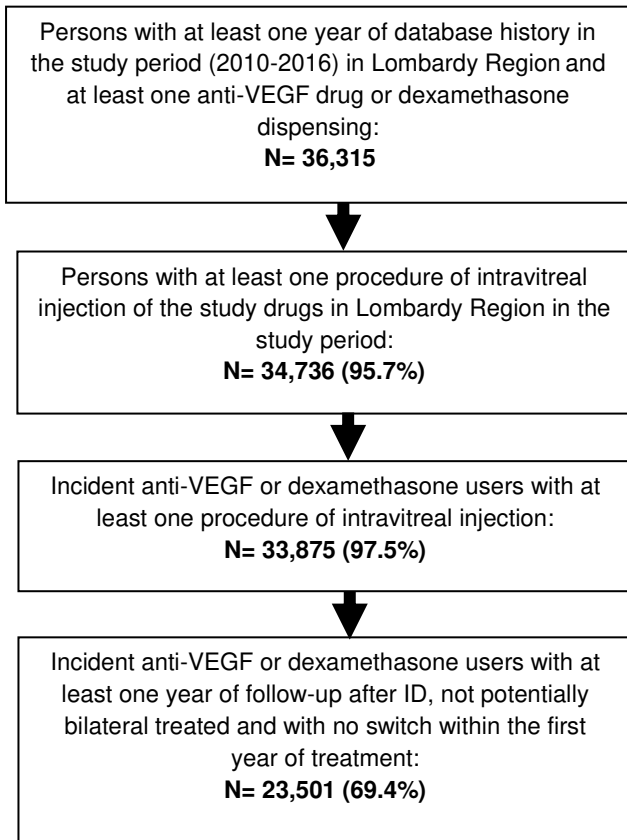

Supplemental Material 5.

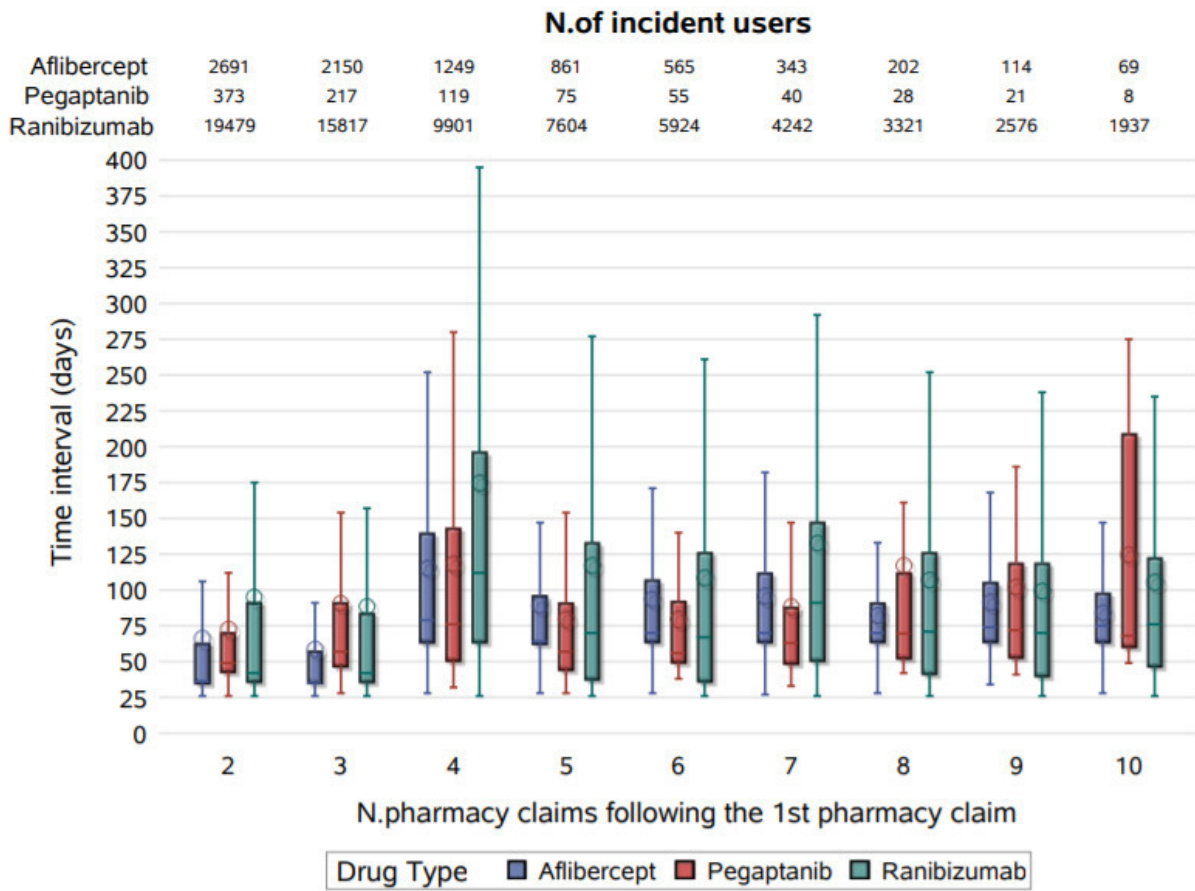

Supplemental Material 6.

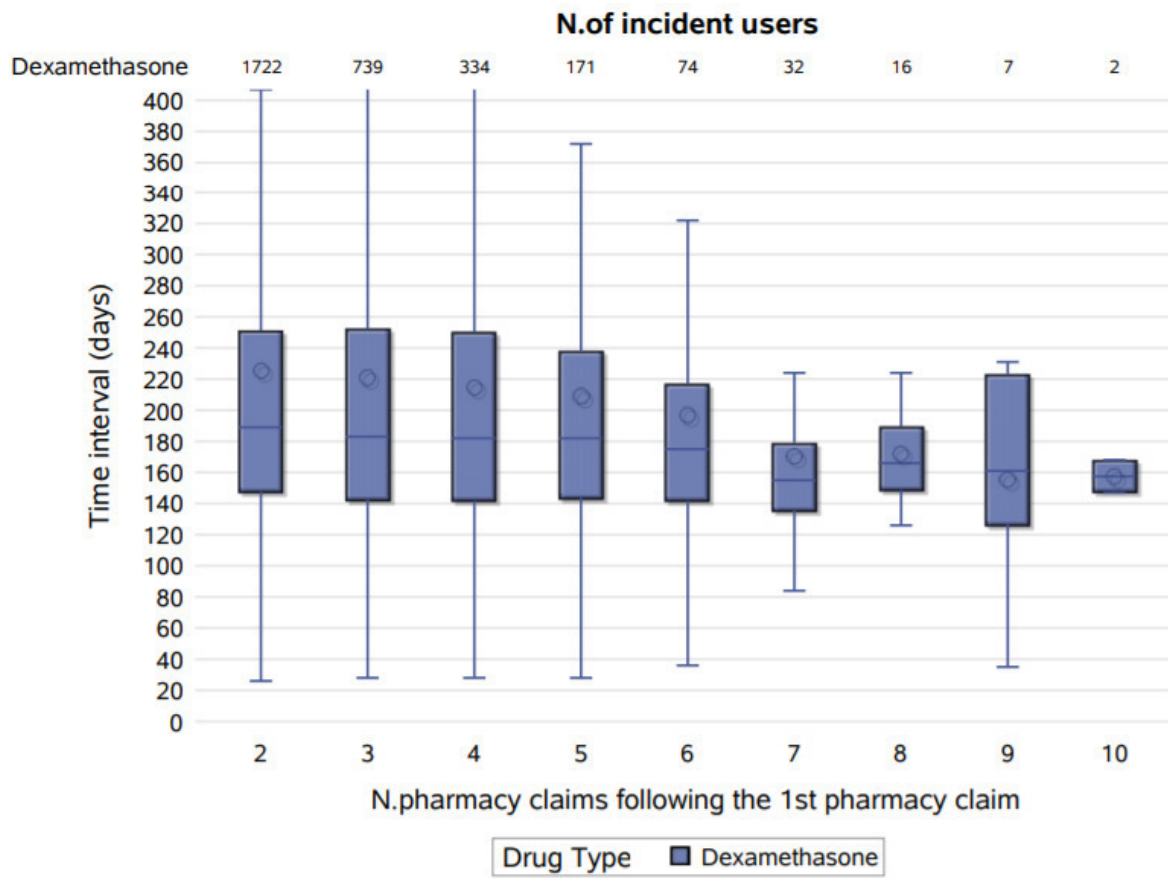

**Supplemental Material 7.**

|                            | <b>Sensitivity</b> | <b>Specificity</b> | <b>Overall accuracy</b> | <b>PPV</b>         | <b>NPV</b>         |
|----------------------------|--------------------|--------------------|-------------------------|--------------------|--------------------|
|                            | <b>% (95% CI)</b>  | <b>% (95% CI)</b>  | <b>% (95% CI)</b>       | <b>% (95% CI)</b>  | <b>% (95% CI)</b>  |
| <b>Bilateral treatment</b> | 25.3 (15.5 - 37.5) | 96.0 (93.2 - 97.8) | 83.8 (79.7 - 87.3)      | 56.6 (40.0 - 71.9) | 86.0 (84.2 - 87.7) |
| <b>DME</b>                 |                    |                    |                         |                    |                    |
| <b>Broad definition</b>    | 35.6 (30.1 - 41.5) | 19.8 (12.2 - 29.5) | 31.8 (27.2 - 36.8)      | 58.5 (54.0 - 62.9) | 8.8 (6.0 - 12.9)   |
| <b>Narrow definition</b>   | 17.7(12.5 - 25.6)  | 98.8 (96.6 - 99.8) | 72.3 (67.6 - 76.8)      | 88.0 (69.1 - 96.0) | 71.2 (69.5 - 72.9) |
